# Supplementary material for: Diffusion-weighted imaging complements T2-weighted MRI for tumour response assessment in squamous anal carcinoma
Source: Springer Nature journal article supplement (doi:10.1007/s00330-023-09942-0), 2023-07-18
Supplement: MOESM1 [file 25816902]

**Diffusion-weighted imaging complements T2-weighted MRI for tumour response  
assessment in squamous anal carcinoma**

**Electronic Supplementary Material**

**Supplemental Table 1.** MRI sequences and typical acquisition parameters.

|                                                              | TR/TE<br>(msec) | Slice<br>thickness<br>(mm) | Interslice<br>gap (mm) | Matrix<br>Size | FOV (cm)  | No. of<br>Signals<br>Acquired |
|--------------------------------------------------------------|-----------------|----------------------------|------------------------|----------------|-----------|-------------------------------|
| Sagittal T2W whole<br>pelvis                                 | 4430/100        | 3                          | .3                     | 307 x 384      | 250 x 250 | 2                             |
| Axial T2W whole<br>pelvis                                    | 4590/101        | 5                          | 1.5                    | 307 x 384      | 300 x 300 | 1                             |
| Small FOV T2W<br>perpendicular and<br>parallel to anal canal | 6530/104        | 3                          | .3                     | 512 x 512      | 200 x 200 | 2                             |
| Axial DWI whole<br>pelvis                                    | 5900/68         | 5                          | 1.5                    | 116 x 154      | 300 x 300 | 4                             |

**Supplemental Table 2.** Observer confidence at assessing tumour response. Significant change towards high confidence scores is seen when T2-weighted MRI and DWI are used in conjunction.

|              | Confidence score | T2*       | T2 + DWI* | P-Value |
|--------------|------------------|-----------|-----------|---------|
| Observer 1   | 2                | 2 (2%)    | 0 (0%)    | <0.001  |
|              | 3                | 31 (36%)  | 10 (12%)  |         |
|              | 4                | 44 (52%)  | 48 (56%)  |         |
|              | 5                | 8 (9%)    | 27 (32%)  |         |
| Observer 2   | 2                | 14 (16%)  | 0 (0%)    | <0.001  |
|              | 3                | 25 (29%)  | 11 (13%)  |         |
|              | 4                | 44 (52%)  | 30 (35%)  |         |
|              | 5                | 2 (2%)    | 44 (52%)  |         |
| Observer 3   | 2                | 10 (12%)  | 1 (1%)    | <0.001  |
|              | 3                | 37 (44%)  | 17 (20%)  |         |
|              | 4                | 32 (38%)  | 38 (45%)  |         |
|              | 5                | 6 (7%)    | 29 (34%)  |         |
| Observer 4   | 2                | 6 (7%)    | 1 (1%)    | <0.001  |
|              | 3                | 27 (32%)  | 13 (15%)  |         |
|              | 4                | 38 (45%)  | 19 (22%)  |         |
|              | 5                | 14 (16%)  | 52 (61%)  |         |
| All combined | 2                | 32 (9%)   | 2 (1%)    | <0.001  |
|              | 3                | 120 (35%) | 51 (15%)  |         |
|              | 4                | 158 (46%) | 135 (40%) |         |
|              | 5                | 30 (9%)   | 152 (45%) |         |

\* Data are number of cases, with percentage of total in parentheses.

**Supplemental Table 3.** Interobserver agreement for expert and non-expert observers for T2-weighted MRI alone and T2-weighted plus DWI.

| Observers  | T2<br>Kappa (95% CI) | T2 + DWI Kappa<br>(95% CI) | Difference #<br>(95% CI) | P-Value |
|------------|----------------------|----------------------------|--------------------------|---------|
| Expert     | 0.40 (0.23, 0.56)    | 0.31 (0.08, 0.43)          | -0.09 (-0.29, 0.12)      | 0.40    |
| Non-expert | 0.39 (0.23, 0.55)    | 0.55 (0.40, 0.71)          | 0.16 (-0.06, 0.38)       | 0.16    |
| All        | 0.28 (0.22, 0.35)    | 0.33 (0.27, 0.40)          | 0.05 (-0.04, 0.14)       | 0.27    |

# Difference calculated as value for T2+DWI minus value for T2
